# Supplementary material
Source: PubMed Central journal article supplement (PMC416467)

All 2.0r outlier genes and dye-swap arrays hierarchically clustered (Pearson correlation, average linkage).

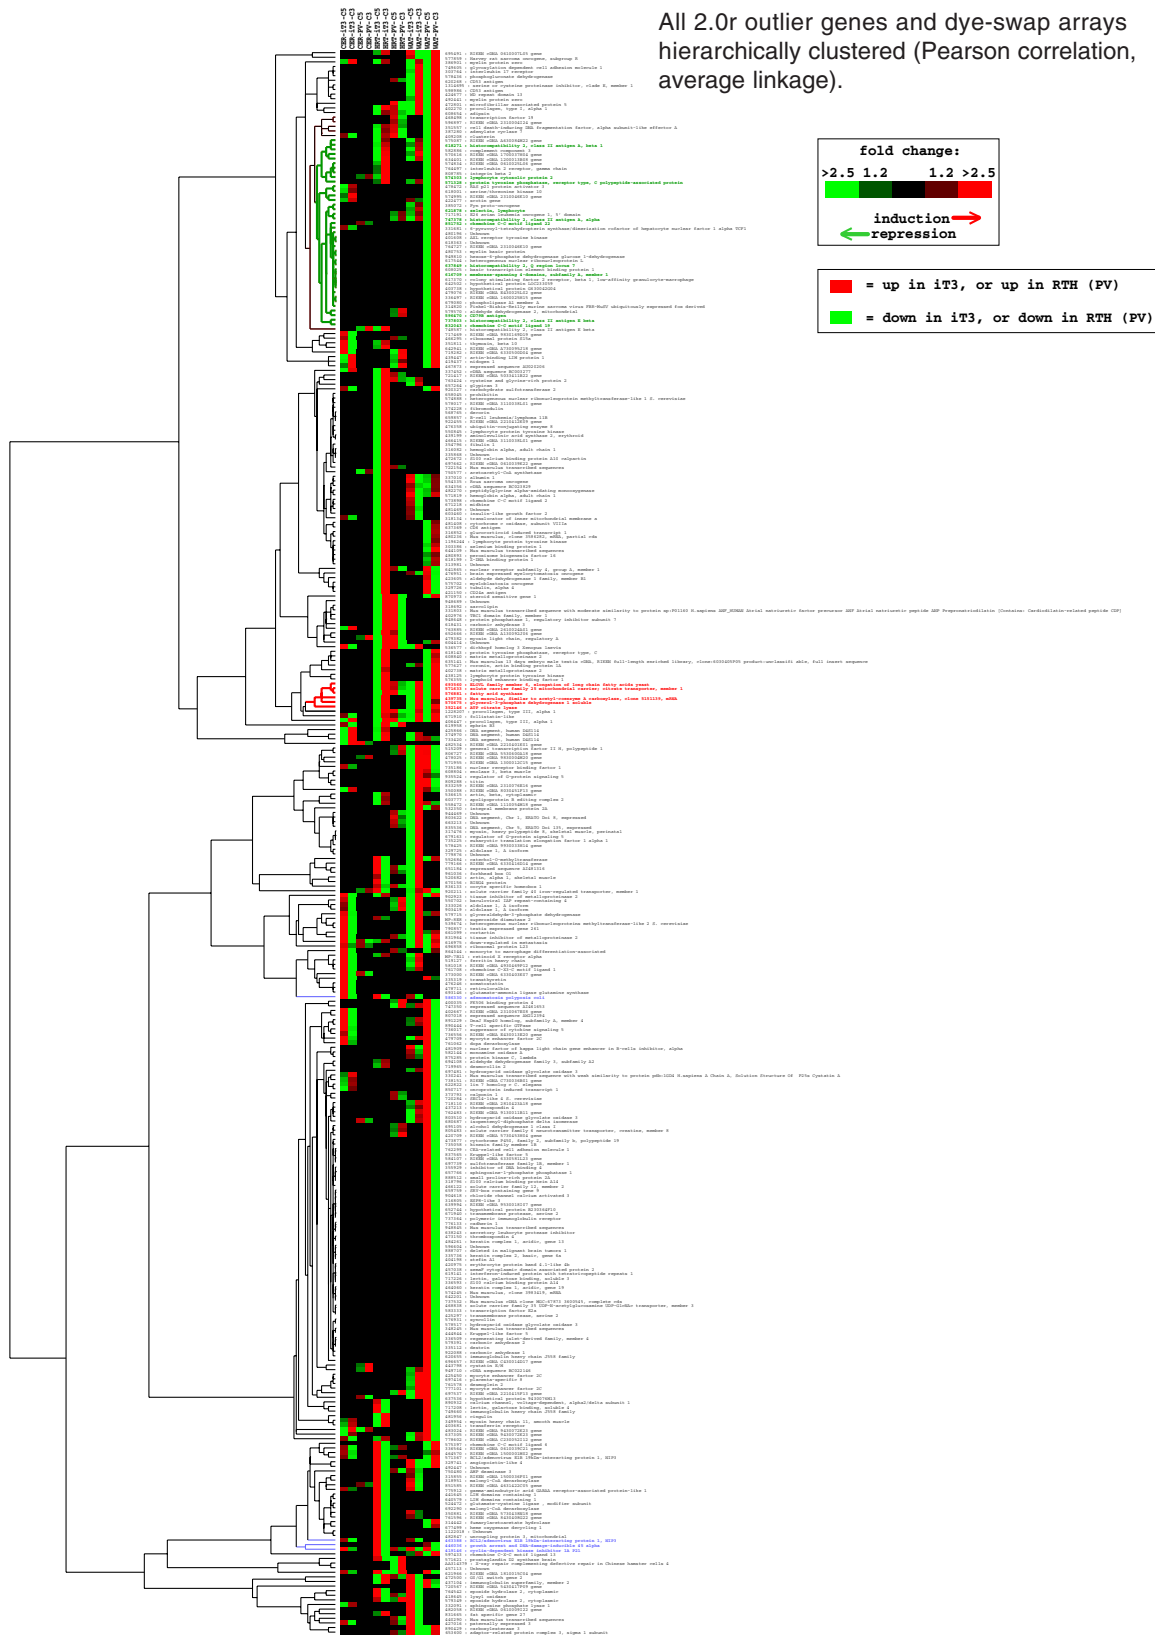

Supplement: gb-2004-5-5-r31-s3.pdf [file gb-2004-5-5-r31-s3.pdf]
